# Supplementary material for: What Makes a National Pharmaceutical Track and Trace System Succeed? Lessons From Turkey
Source: PubMed Central journal article supplement (PMC7541108; doi:10.9745/ghsp-d-20-00084), 2020-09-30
Supplement: 20-00084-Parmaksiz-Supplement_2.pdf [file 20-00084-Parmaksiz-Supplement_2.pdf]

## Coding Tree

| Primary Code          | Secondary Code      | Tertiary Code                                                                                                                                     | Quaternary Code                    | Quinary Code       |
|-----------------------|---------------------|---------------------------------------------------------------------------------------------------------------------------------------------------|------------------------------------|--------------------|
| 00_Political_economy  |                     |                                                                                                                                                   |                                    |                    |
|                       | Economic_factors    | Jobs<br>National_income                                                                                                                           |                                    |                    |
|                       | Political_factors   | Lobbying<br>Political_promises<br>Political_will                                                                                                  |                                    |                    |
| 01_Market_opportunity |                     |                                                                                                                                                   |                                    |                    |
|                       | 1_Supply_side       | Conflict_or_disaster<br>Distorting_regulation<br>Infrastructure<br>Limited_manufacturing_capacity<br>Procurement_practices<br>Producer_incentives |                                    |                    |
|                       | 2_Demand_side       | Affordability_out_of_pocket<br>Affordability_UHC_insurance<br>Incentive_structures<br>Patient_preference<br>Unexpected_demand                     |                                    |                    |
|                       | 3_Market_regulation | Price_related                                                                                                                                     | Global_budget<br>Reference_pricing | Future adaptations |

Consequences  
 Functioning  
 Reaction\_towards\_RP

Trade\_related

02\_Market\_dynamics

Export  
 Import  
 Parallel\_trade  
 Transit

03\_Actors

1\_Macro                      Government  
                                     MOH  
                                     Organised\_crime  
                                     Other\_international\_org  
                                     WHO

2\_Producers (see also 9)

3\_Supply\_chain              Brokers  
                                     Distributors  
                                     Smugglers  
                                     Wholesalers

4\_Healthcare\_professionals   Hospital  
                                     Insurers  
                                     Pharmacy

5\_Patient\_market\_interface   Internet  
                                     Market

|                             |                                                                                                          |
|-----------------------------|----------------------------------------------------------------------------------------------------------|
| 6_Regulators                | MRA<br>Police                                                                                            |
| 04_Facilitator              |                                                                                                          |
| Corruption                  | Protecting_economic_interests                                                                            |
| Disruption_&_adaptation     | New_technologies<br>Pricing_and_or_medicine shortage                                                     |
| Limited_capacity            | Financial_resources<br>Human_resources<br>Technology                                                     |
| Systemic_failure            | No_due_dilligence<br>Poor_coordination<br>Poor_planning                                                  |
| 05_Motivator                |                                                                                                          |
| 1_Legal_profit              | Arbitrage<br>Competitive_advantage<br>Cost_reduction                                                     |
| 2_Illegal_or_liminal_profit | Access_to_meds<br>Avoid_red_tape_or_laziness<br>Fraud_&_money_laundersing<br>Need<br>Perverse_incentives |
| 06_Deterent                 |                                                                                                          |
| 1_Product_regulation        | GDP<br>GMP<br>Inspection                                                                                 |

|                       |                                  |                                   |
|-----------------------|----------------------------------|-----------------------------------|
|                       | Licensing_&_market_authorisation |                                   |
|                       | Standard operating procedures    |                                   |
| 2_Detection           | Laboratory                       |                                   |
|                       | Reporting_systems                |                                   |
|                       | Risk_assesment                   |                                   |
|                       | Track_and_trace                  | Future adaptations                |
|                       |                                  | Consequences                      |
|                       |                                  | Costs                             |
|                       |                                  | Functioning                       |
|                       |                                  | Implementation_problems           |
|                       |                                  | Physical_problems                 |
|                       |                                  | Software_problems                 |
|                       |                                  | Reactions_towards_track&trace     |
| 3_Transparency        |                                  |                                   |
| 4_Systemic_approach   | Avoid_production_shortages       |                                   |
| <b>07_Legislation</b> |                                  |                                   |
|                       | Definitions                      |                                   |
|                       | Medicine-related-laws            |                                   |
|                       | Penalties                        | Enforcement                       |
|                       |                                  | Penalties_for_other_falsification |
|                       |                                  | Penalties_for_pharma_crime        |
| <b>08_Quality</b>     |                                  |                                   |
|                       | Falsified                        | Criminal_substandard              |
|                       |                                  | Expiry_date_extended              |
|                       |                                  | Quality_but_falsely_labelled      |
|                       |                                  | Repackaged_as_different_product   |

|                     |                          |
|---------------------|--------------------------|
|                     | Total_fake               |
| Other_illegal       | Stolen_or_diverted       |
|                     | Unregistered             |
| Substandard         | Degraded                 |
| 09_Category_of_meds |                          |
| Producer_type       | API                      |
|                     | Generic                  |
|                     | Innovator                |
| Therapeutic         | Lifestyle                |
|                     | Noncommunicable diseases |
|                     | Other                    |
|                     | Sexual_health            |
|                     | Vaccines                 |

Abbreviations: API, Active Pharmaceutical Ingredient; GDP, Good Distribution Practice; GMP, Good Manufacturing Practices; MOH, Ministry of Health; MRA, Medicines Regulatory Authority; RP, Reference Pricing; WHO, World Health Organization.
